# Supplementary material for: Addressing Breast Cancer Equity Through Virtual Community Oncology Navigation and Engagement (vCONET)
Source: PubMed Central journal article supplement — Cancer Control. 2024 Aug 2;31:10732748241264711. doi: 10.1177/10732748241264711 (PMC11456699; doi:10.1177/10732748241264711), 2024-08-02
Supplement: sj-pdf-1-ccx-10.1177_10732748241264711.pdf [file sj-pdf-1-ccx-10.1177_10732748241264711.pdf]

**Addressing Breast Cancer Equity through virtual Community Oncology Navigation and Engagement (vCONET)  
Focus Group Questions**

Thank you for coming to this focus group to discuss your experience using the vCONET Second Life Program. Our purpose here today is to talk about your feelings relative to the program, what you liked and what could be improved. Specifically, we are interested in learning the best ways to share health information about breast cancer prevention and awareness with you and in your community. We have some questions to get you started, but we consider you to be the “experts” about what works best for you and in your community. There are no right or wrong answers to the questions. Also, let’s make sure we protect everyone’s privacy. So please do not share anything that someone else says here outside the focus group discussion. In addition, please do not discuss this project with anyone else.

1. First, let us go around and talk freely about your experience with the vCONET Second Life program.
2. How did you feel about the program (second life) that you used?
  - a. Benefits
    - i. What did you like about it?
  - b. Challenges
    - i. What did you find challenging about it? (probe- did you need help with using the program – if so, which aspects?)
  - c. Recommendations
    - i. What do you feel would improve the experience?
      1. The setting, - background, avatars?
      2. The information- the way it was displayed?
  - d. What kinds of health information sources generally works best for you, and why?
    - i. (probes – Word of mouth, health fairs, providers, etc.)
  - e. How much do they influence your health decisions?
3. Now, let’s talk more about breast cancer information in your community.
  - a. How often do you hear about breast cancer?
    - i. Where are you most likely to get this information?
  - b. Do you feel that you have enough information about breast cancer?
  - c. What do you feel Black women in the community should know about breast cancer?
  - d. What would you most want to know about breast cancer? What kinds of information would interest you the most?
  - e. How interested are you in knowing about the latest developments in breast cancer research, especially focusing on information relevant to Black women?
4. If you were to put together breast cancer messages for women in your age group, to encourage others to understand the risks of developing breast cancer and promote more mammography screenings, and deliver these messages virtually, what do you think would be the best way to do this?
  - a. What type of virtual application would work best?
    - i. Continue second life program, introduce another mode (mobile app, Virtual reality, etc.)?
  - b. What would the message look like?
  - c. What would be the best way of making sure Black women saw or heard that message? How would you deliver it to Black women?
5. Describe anything else you think we should know about how breast cancer information is best shared with you and in your community.
