# Supplementary material for: Addressing Breast Cancer Equity Through Virtual Community Oncology Navigation and Engagement (vCONET)
Source: PubMed Central journal article supplement — Cancer Control. 2024 Aug 2;31:10732748241264711. doi: 10.1177/10732748241264711 (PMC11456699; doi:10.1177/10732748241264711), 2024-08-02
Supplement: sj-pdf-2-ccx-10.1177_10732748241264711.pdf [file sj-pdf-2-ccx-10.1177_10732748241264711.pdf]

# Baseline Survey

1. Do you have public or private insurance to cover part of your medical bills?

*Mark only one oval.*

- Yes
- No
- Can't Say/No Response

2. Do you have physical health exams each year?

*Mark only one oval.*

- Yes
- No
- Can't Say/No Response

3. Do you have a doctor that you see regularly for your medical care?

*Mark only one oval.*

- Yes
- No
- Can't Say/No Response

4. Have you had a mammography screening within the last year?

*Mark only one oval.*

- Yes
- No
- Can't Say/No Response

5. Have you read or heard about clinical trials about breast cancer within the last year?

*Mark only one oval.*

- Yes
- No
- Can't Say/No Response

6. Were you asked to participate in a clinical trial about breast cancer within the last year?

*Mark only one oval.*

- Yes
- No
- Can't Say/No Response

7. If asked, would you participate in a clinical trial about breast cancer?

*Mark only one oval.*

- Yes
- No
- Can't Say/No Response

8. Have you ever been told by a doctor that you are at risk for breast cancer?

*Mark only one oval.*

- Yes
- No
- Can't Say/No Response

9. Have you ever learned about breast cancer and/or mammograph screening services virtually (Facebook, whatsApp, Twitter, DOH, online websites, or others)?

*Mark only one oval.*

- Yes  
 No  
 Can't Say

10. Where have you learned about breast cancer and/or mammography screening information?

*Check all that apply.*

- Facebook  
 WhatsApp  
 Twitter  
 DOH  
 Online Websites  
 Other:  
\_\_\_\_\_

11. Your ethnicity is:

- Black: African-American  
 Black: African  
 Black: Caribbean  
 Black: European  
 Black: South  
 American Other:  
\_\_\_\_\_

12. Your age range is:

*Mark only one oval.*

**Addressing Breast Cancer Equity through Virtual Community Oncology Navigation and Engagement (vCONET)**

- 18-29
- 30-39
- 40-49
- 50-59
- 60-69
- 70-79 80 years
- and above

13. Your education level is:

*Mark only one oval.*

- Less than high school
- High school degree
- Some college training
- College degree
- Post College degree (Masters or PhD)

14. Your martial status is:

*Mark only one oval.*

- Single
- Married
- Divorced
- Widowed

15. Your current residence is classified as:

*Mark only one oval.*

- Rural
- Urban

16. Your employment status is

*Mark only one oval.*

- full time part-
- time retired
- unemployed receiving disability/workers
- compensation
- 17. Your household income is between:

*Mark only one oval.*

- 0 and \$19,999
- \$20,000 and \$39,999
- \$40,000 and \$59,999
- \$60,000 and \$79,999
- \$80,000 and \$99,999
- \$100,000 and above

---

### Post Survey

1. Overall, I'm very satisfied with the virtual second life computer program.

*Mark only one oval.*

Addressing Breast Cancer Equity through Virtual Community Oncology Navigation and Engagement (vCONET)

- Strongly Agree
- Agree
- Neutral
- Disagree
- Strongly Disagree
- Can't Say/ No Response

2. The information I received from the second life program was useful to me.

*Mark only one oval.*

- Strongly Agree
- Agree
- Neutral
- Disagree
- Strongly Disagree
- No Response/ Can't Say

3. I felt comfortable using the second life program

*Mark only one oval.*

- Strongly Agree
- Agree
- Neutral
- Disagree
- Strongly Disagree
- No Response/ Can't Say

4. Within the next year, I will get a mammography screen to test for breast cancer.

*Mark only one oval.*

Addressing Breast Cancer Equity through Virtual Community Oncology Navigation and Engagement (vCONET)

- Strongly Agree
- Agree
- Neutral
- Disagree
- Strongly Disagree
- No Response/ Can't Say

5. Within the next year, I intend to actively seek information that will allow me to make the best decision about breast cancer prevention and early detection.

*Mark only one oval.*

- Strongly Agree
- Agree
- Neutral
- Disagree
- Strongly Disagree

6. Was the information useful to you?

*Mark only one oval.*

- Yes
- No
- Can't Say

7. Did you experience any difficulty with using the second life program?

*Mark only one oval.*

- Yes
- No
- Can't Say

8. Would you be more comfortable reviewing the information from the computer at a different setting, such as your home, or health care office, such as a doctor's office, pharmacy, or clinic?

*Mark only one oval.*

- Yes  
 No  
 Can't Say

9. Was the information too long or too time consuming?

*Mark only one oval.*

- Yes  
 No  
 Can't Say

10. Did you find any of the information uncomfortable?

*Mark only one oval.*

- Yes  
 No  
 Can't say

11. Would you want to use the second life program again in the future?

*Mark only one oval.*

- Yes  
 No  
 Can't Say



12. Does using the computer program second life have the potential to increase knowledge about breast cancer among Black women?

*Mark only one oval.*

- Yes  
 No  
 Can't Say

13. Do you have access to Wi-Fi or high speed internet?

*Mark only one oval.*

- Yes  
 No  
 Can't Say

14. Please share any other comments you have below:

---
